# Supplementary material for: A novel model based on necroptosis-related genes for predicting immune status and prognosis in glioma
Source: PubMed Central journal article supplement (PMC9640834; doi:10.3389/fimmu.2022.1027794), 2022-10-25
Supplement: DataSheet_5.pdf [file DataSheet_5.pdf]

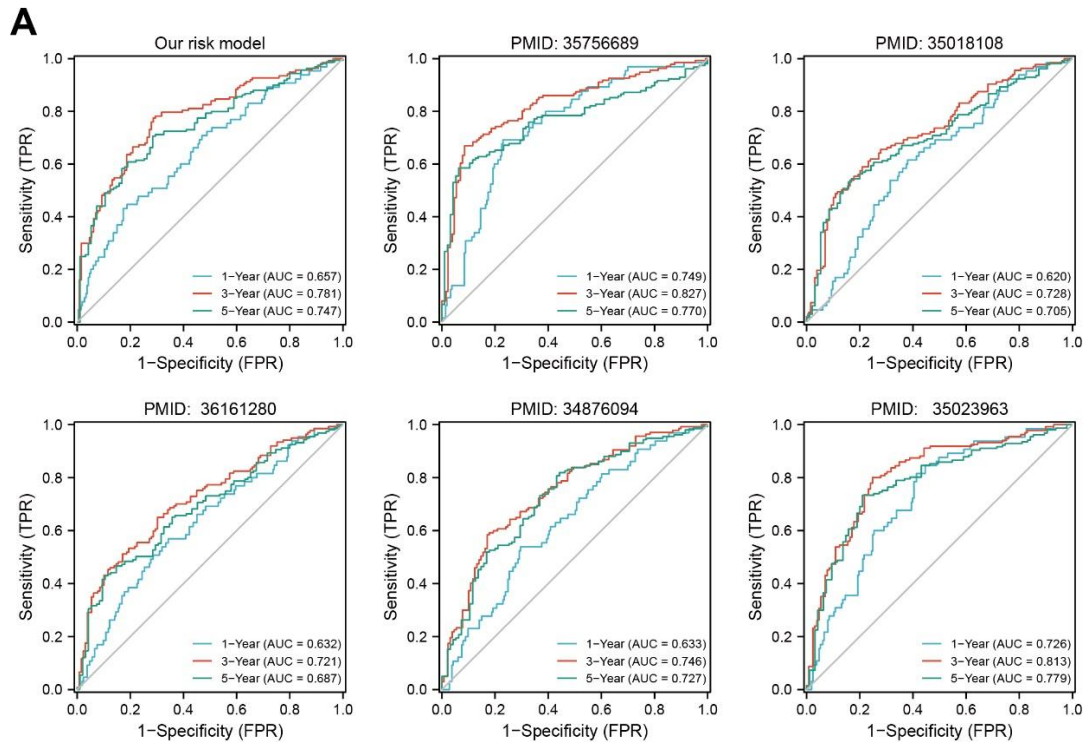

**B**

| References (PMID) | Number of genes in the model | 1-, 3-, 5-year AUCs in CGGA301 cohort | C-index of the model | Validation in clinical samples                          |
|-------------------|------------------------------|---------------------------------------|----------------------|---------------------------------------------------------|
| 35756689(1)       | 7                            | 0.749, 0.827, 0.770                   | 0.697 (0.681-0.714)  | No                                                      |
| 35018108(2)       | 5                            | 0.620, 0.728, 0.705                   | 0.630 (0.611-0.650)  | Yes (12 pairs, gene expression)                         |
| 36161280(3)       | 3                            | 0.632, 0.721, 0.687                   | 0.624 (0.603-0.645)  | Yes (12 pairs, gene expression)                         |
| 34876094(4)       | 10                           | 0.633, 0.746, 0.727                   | 0.645 (0.625-0.666)  | No                                                      |
| 35023963(5)       | 9                            | 0.726, 0.813, 0.779                   | 0.687 (0.670-0.705)  | No                                                      |
| Our risk model    | 3                            | 0.657, 0.781, 0.747                   | 0.668 (0.648-0.688)  | Yes (43 paired samples, gene expression and risk model) |

**Supplementary Figure 5. Benchmarking prognostic models.** (A) ROC curves of partially existing models and the model proposed in this study based on CGGA301 cohort. (B) AUCs and C-index showed that our three-gene prognostic model achieved similarly great prediction performance compared with existing models.

## References

1. Yun D, Wang X, Wang W, Ren X, Li J, Wang X, et al. A Novel Prognostic Signature Based on Glioma Essential Ferroptosis-Related Genes Predicts Clinical Outcomes and Indicates Treatment in Glioma. *Front Oncol.* 2022;12:897702.
2. Zheng J, Zhou Z, Qiu Y, Wang M, Yu H, Wu Z, et al. A Pyroptosis-Related Gene Prognostic Index Correlated with Survival and Immune Microenvironment in Glioma. *J Inflamm Res.*

2022;15:17-32.

3. Zhang M, Cheng Y, Xue Z, Sun Q, Zhang J. A novel pyroptosis-related gene signature predicts the prognosis of glioma through immune infiltration. *BMC Cancer*. 2021;21(1):1311.
4. Chen J, Chen S, Li B, Zhou S, Lin H. A pyroptosis-related signature predicts prognosis and indicates immune microenvironment infiltration in glioma. *Cancer Med*. 2022.
5. Sun W, Yan J, Ma H, Wu J, Zhang Y. Autophagy-Dependent Ferroptosis-Related Signature is Closely Associated with the Prognosis and Tumor Immune Escape of Patients with Glioma. *Int J Gen Med*. 2022;15:253-70.
