# Supplementary material for: A novel model based on necroptosis-related genes for predicting immune status and prognosis in glioma
Source: PubMed Central journal article supplement (PMC9640834; doi:10.3389/fimmu.2022.1027794), 2022-10-25
Supplement: DataSheet_6.pdf [file DataSheet_6.pdf]

## CGGA301

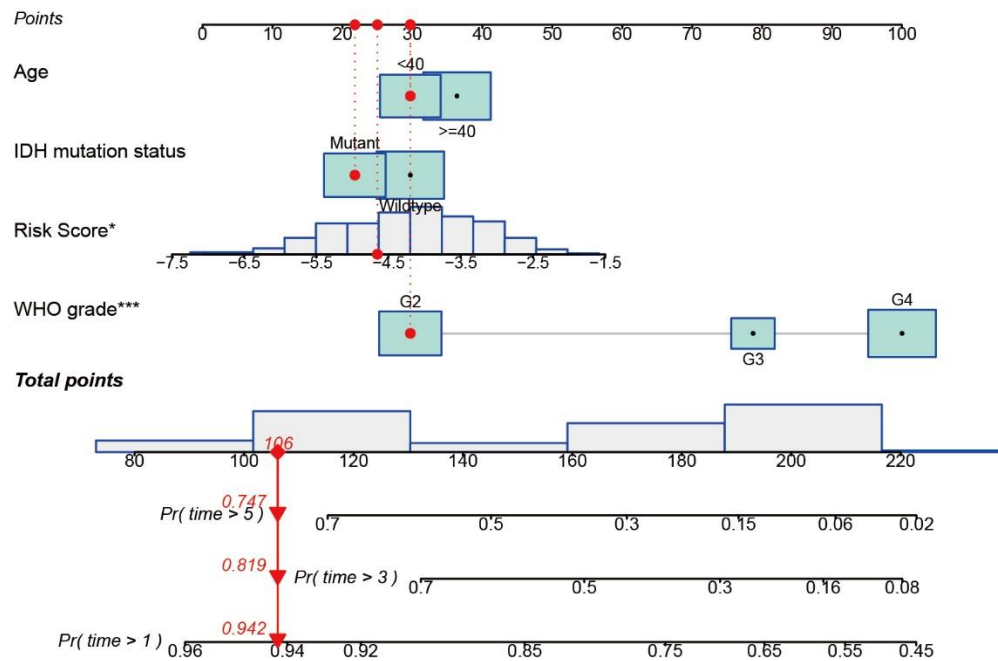

## CGGA325

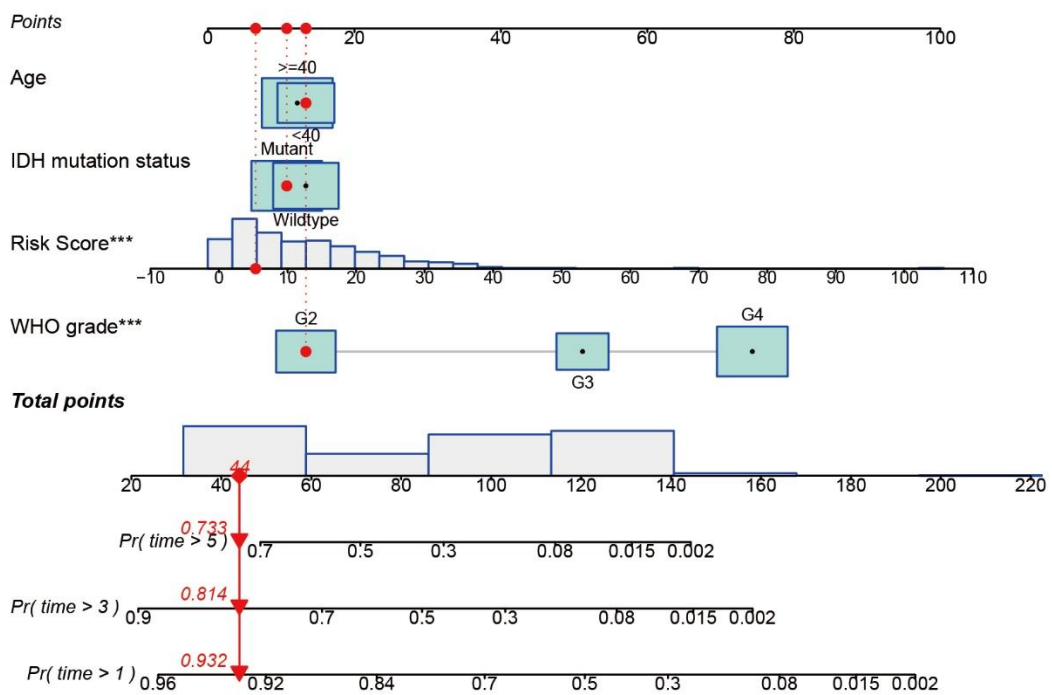

**Supplementary Figure 6. Prognostic nomogram to predict the 1-, 3-, and 5-year OS in CGGA301 and 325 validation sets. Red dots represent one case from the cohort.**
